# Supplementary material
Source: PubMed Central journal article supplement (PMC6065500)
Supplement: jiy071_suppl_supplementary_figures.pdf [file jiy071_suppl_supplementary_figures.pdf]

Figure S1:

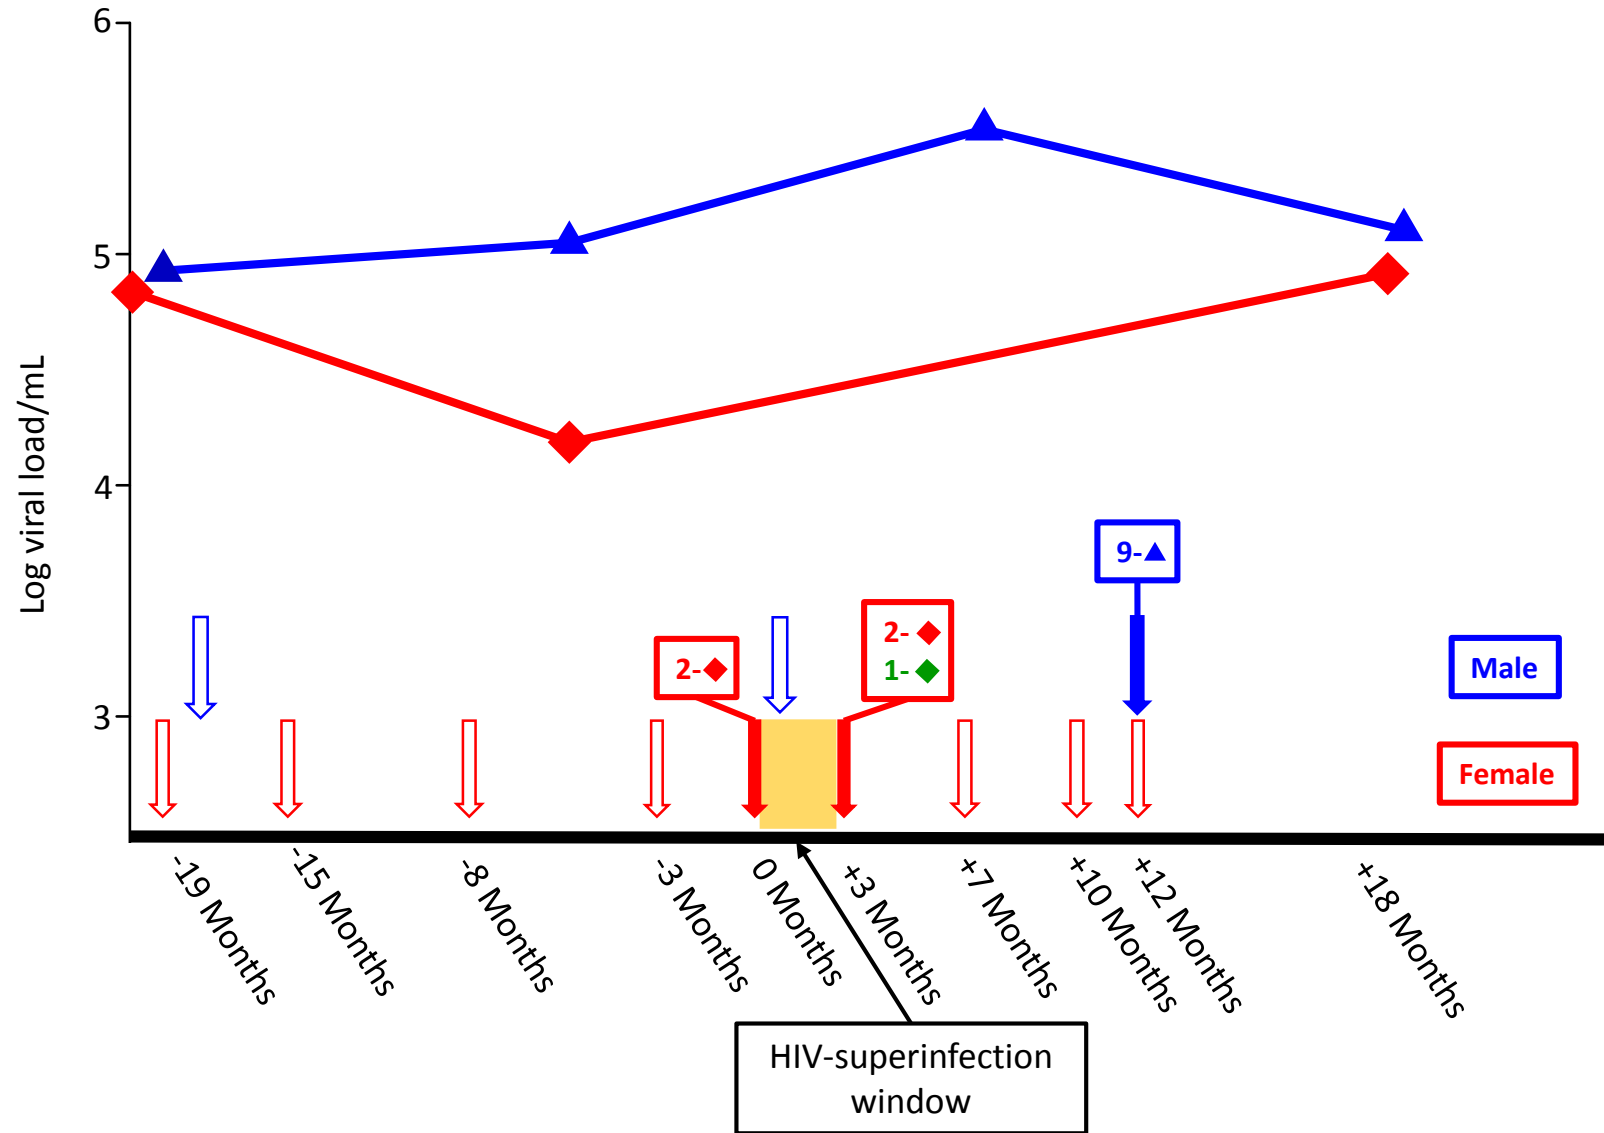

Figure S2:

A)

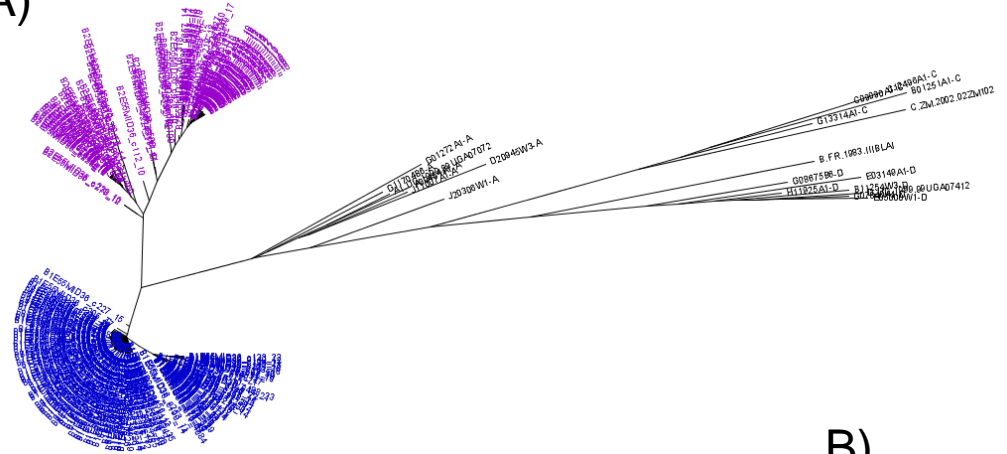

B)

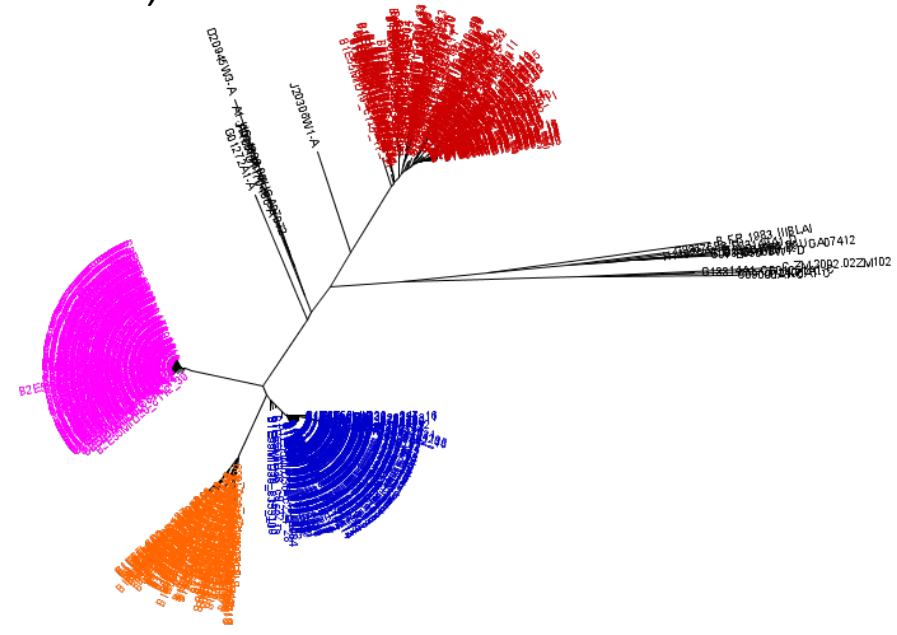

C)

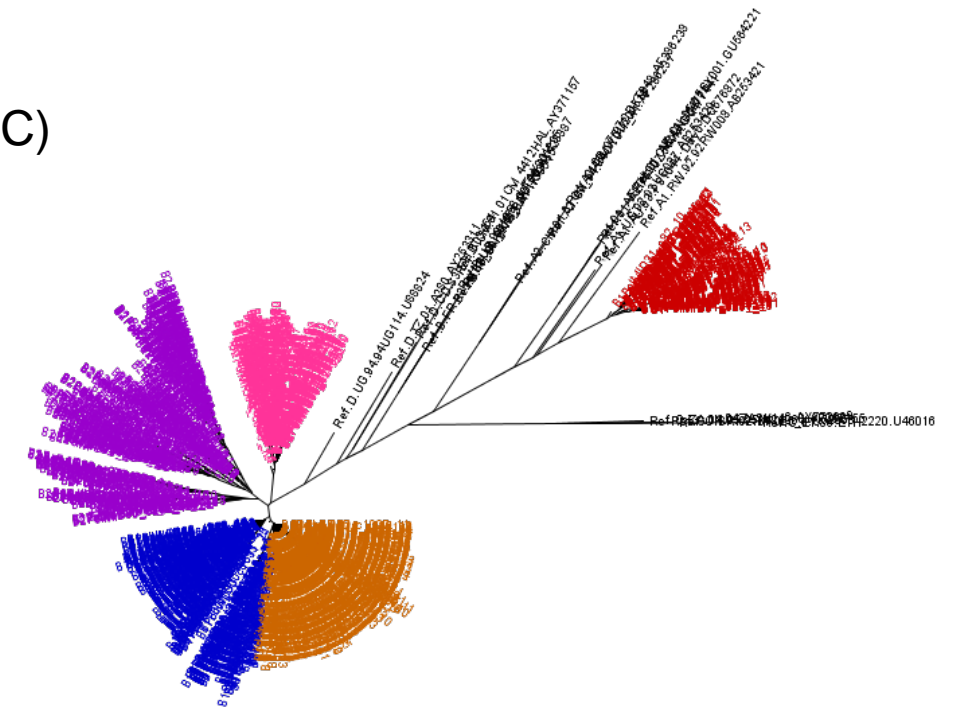

Figure S3:

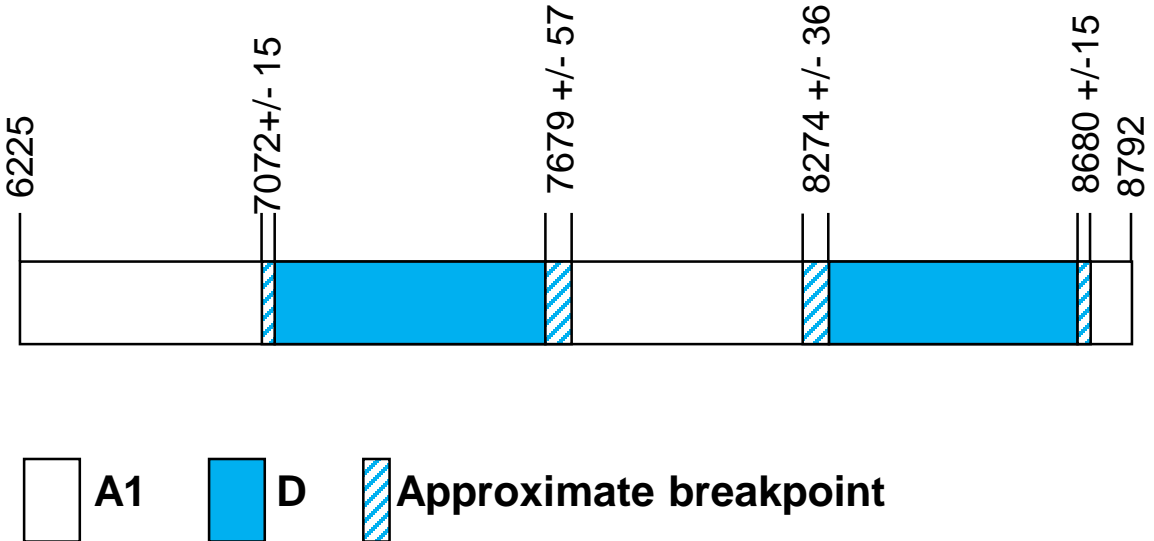

Figure S4:

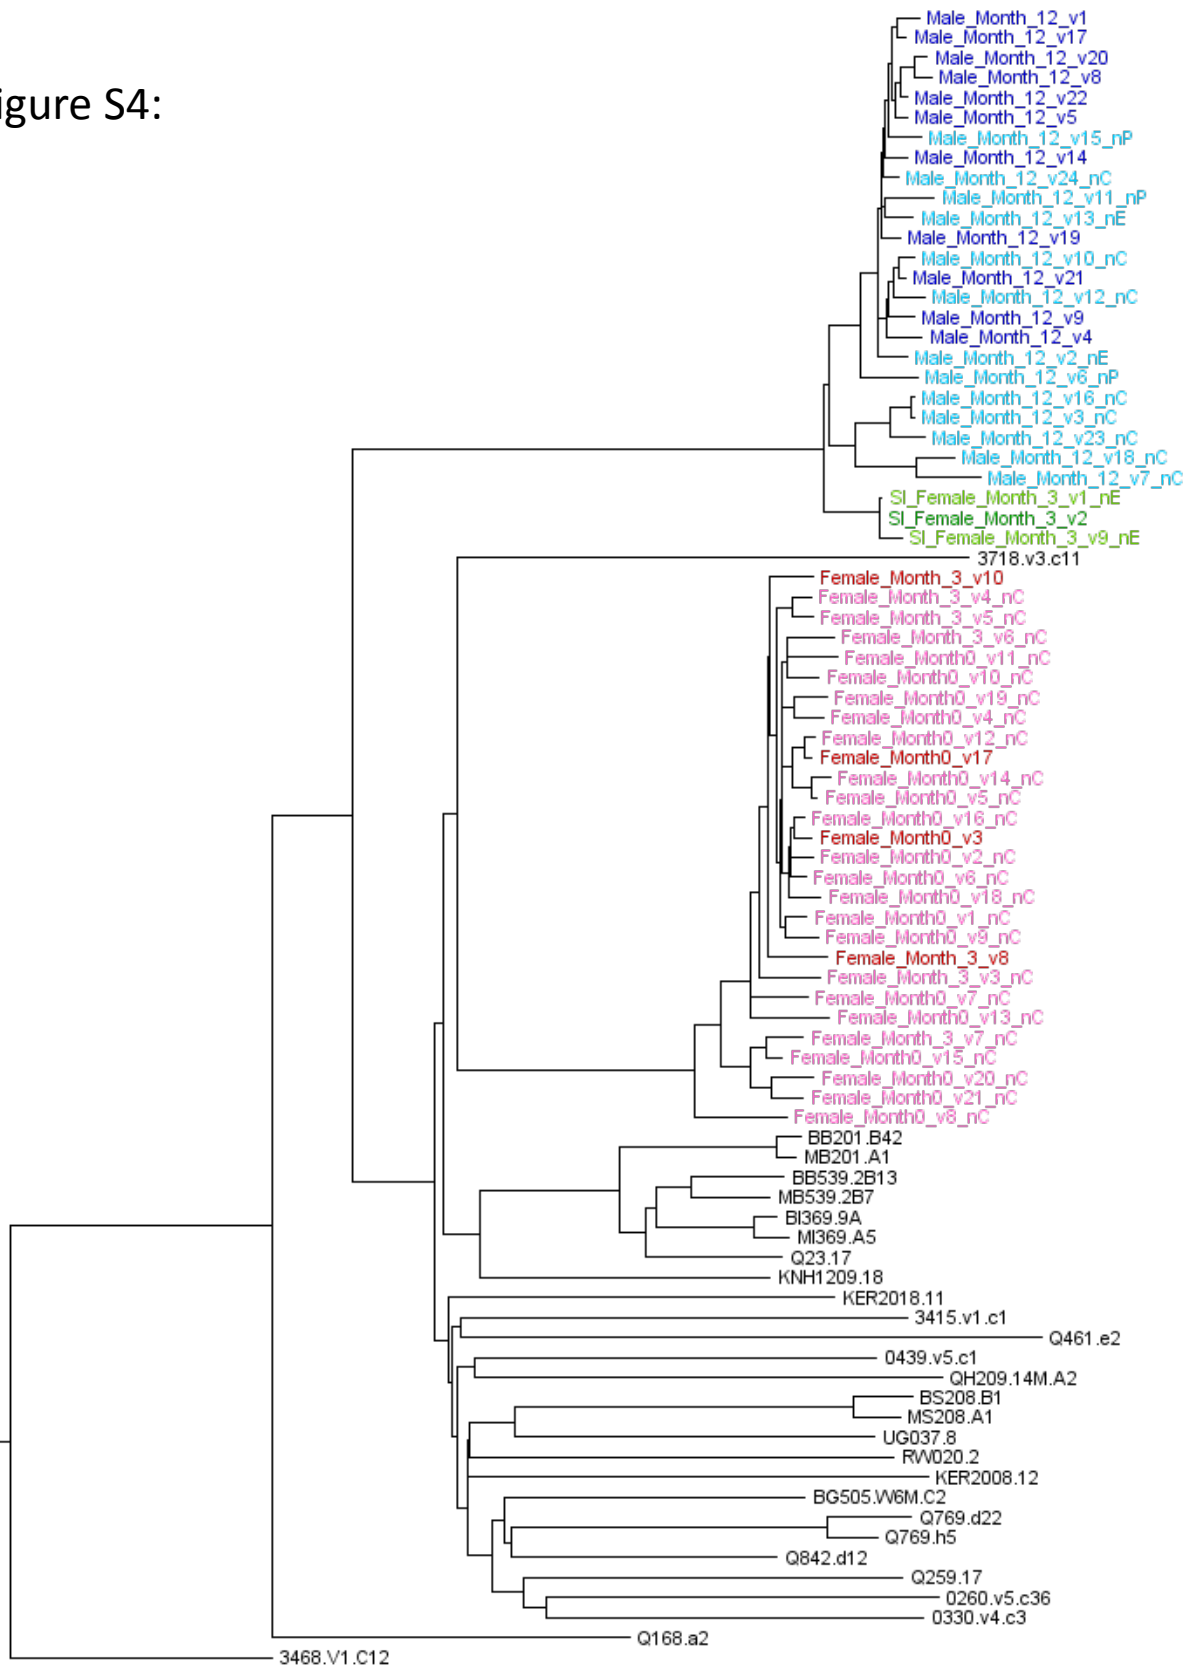

0.02

Figure S5:

| Virus from Sample       | Pseudovirus          | IC50  |        |        |        |       |                 |               |         |         |      |
|-------------------------|----------------------|-------|--------|--------|--------|-------|-----------------|---------------|---------|---------|------|
|                         |                      | VRC01 | PGT121 | PGT128 | PGT145 | 10E8  | CAP256-VRC26.25 | N123-VRC34.01 | 17b IgG | 447-52D | F105 |
| <b>Female 0 Months</b>  | Female_Month0_v3     | 1.42  | 0.105  | 0.04   | 0.479  | 2.51  | 0.045           | 2.95          | >50     | >50     | >50  |
|                         | Female_Month0_v17    | 1.34  | 0.127  | 0.089  | 0.209  | 2.66  | 0.343           | 4.4           | >50     | >50     | >50  |
| <b>Female +3 Months</b> | Female Month+3_v8    | 2.51  | 0.119  | 0.109  | 0.397  | 3.53  | 0.135           | 6.47          | >50     | >50     | >50  |
|                         | Female Month+3_v10   | 1.9   | >50    | >50    | 0.162  | 2.04  | 0.077           | 7.87          | >50     | >50     | >50  |
|                         | SI-Female Month+3_v2 | 0.602 | >50    | 0.015  | 0.023  | 0.664 | 0.013           | 0.116         | >50     | >50     | >50  |
| <b>Male +12 Months</b>  | Male Month+12_v1     | 0.128 | >50    | 0.107  | 0.091  | 0.449 | ND              | 0.158         | >50     | >50     | >50  |
|                         | Male Month+12_v4     | 0.701 | >50    | 0.023  | 0.043  | 0.01  | 0.004           | 0.071         | >50     | >50     | >50  |
|                         | Male Month+12_v5     | 0.121 | >50    | 0.038  | 0.115  | 0.021 | 0.007           | 0.104         | >50     | >50     | >50  |
|                         | Male Month+12_v8     | 0.116 | >50    | 0.076  | 0.062  | 0.005 | 0.003           | 0.253         | >50     | >50     | >50  |
|                         | Male Month+12_v9     | 0.109 | >50    | 0.109  | 0.068  | 0.045 | 0.002           | 0.182         | >50     | >50     | >50  |
|                         | Male Month+12_v14    | 0.118 | >50    | 0.015  | 0.178  | 0.058 | 0.008           | 0.091         | >50     | >50     | >50  |
|                         | Male Month+12_v17    | 0.109 | >50    | 0.276  | 0.068  | 0.01  | 0.004           | 0.17          | >50     | >50     | >50  |
|                         | Male Month+12_v20    | 0.134 | >50    | 0.052  | 0.049  | 0.131 | 0.002           | 0.107         | >50     | >50     | >50  |
| Male Month+12_v21       | 0.091                | >50   | 0.082  | 0.042  | 0.012  | 0.005 | 0.199           | >50           | >50     | >50     |      |

IC50 (µg/ml) <0.001 .001-0.01 .01-0.100 .100-1.00 1.00-10.0 10-50 >50
